# Supplementary material for: Differences in uni-dimensional breathlessness measures and thresholds for clinical response in a randomised controlled trial in people with chronic breathlessness: an exploratory study
Source: PubMed Central journal article supplement — BMJ Open Respir Res. 2024 Dec 4;11(1):e002370. doi: 10.1136/bmjresp-2024-002370 (PMC11624816; doi:10.1136/bmjresp-2024-002370), 2024-12-04
Supplement: bmjresp-11-1-s001.pdf [file bmjresp-11-1-s001.pdf]

Web appendices

Sub-group analysis from a parallel arm, randomised, placebo controlled clinical trial with multiple imputation for missing values: Forest plot of treatment reporting odds ratios for visual analogue scores of mean breathlessness response at days 5-7 compared to baseline by sub-group on an intention to treat basis. (n=284)

Appendix 1:

| Domain: Intensity. Threshold for difference: <b>15% relative difference</b> mean days 5-7 over baseline<br>Measure 0-100mm visual analogue scale (VAS) - <i>best breathlessness</i> in the previous 24 hours. | Number |          |         | Odds ratio (OR) | 95% CI |       | p value |
|---------------------------------------------------------------------------------------------------------------------------------------------------------------------------------------------------------------|--------|----------|---------|-----------------|--------|-------|---------|
|                                                                                                                                                                                                               | Total  | Observed | Imputed |                 | Lower  | Upper |         |
| Overall                                                                                                                                                                                                       | 241    | 214      | 27      | 1.06            | 0.81   | 1.38  | 0.695   |
| COPD - Yes                                                                                                                                                                                                    | 140    | 120      | 20      | 1.16            | 0.57   | 2.35  | 0.688   |
| COPD - No                                                                                                                                                                                                     | 101    | 94       | 7       | 1.06            | 0.46   | 2.41  | 0.893   |
| Baseline mMRC - 1 or 2                                                                                                                                                                                        | 76     | 67       | 9       | 1.52            | 0.58   | 3.97  | 0.395   |
| Baseline mMRC - 3 or 4                                                                                                                                                                                        | 158    | 141      | 17      | 1.02            | 0.52   | 1.99  | 0.949   |
| COPD - Yes; Baseline mMRC - 1 or 2                                                                                                                                                                            | 46     | 39       | 7       | 1.88            | 0.53   | 6.67  | 0.330   |
| COPD - Yes; Baseline mMRC - 3 or 4                                                                                                                                                                            | 92     | 80       | 12      | 0.92            | 0.39   | 2.18  | 0.849   |
| COPD - No; Baseline mMRC - 1 or 2                                                                                                                                                                             | 30     | 28       | 2       | 1.04            | 0.24   | 4.53  | 0.963   |
| COPD - No; Baseline mMRC - 3 or 4                                                                                                                                                                             | 66     | 61       | 5       | 1.20            | 0.42   | 3.41  | 0.737   |

CI - confidence intervals; mMRC - modified Medical Research Council breathless scale; COPD – chronic obstructive pulmonary disease.

| Domain: Intensity. Threshold for difference: <b>8.9mm absolute difference</b> mean days 5-7 over baseline<br>Measure 0-100mm visual analogue scale (VAS) - <i>best breathlessness</i> in the previous 24 hours. |                                                                                    | Number |          |         | Odds ratio (OR) | 95% CI |       | p value |
|-----------------------------------------------------------------------------------------------------------------------------------------------------------------------------------------------------------------|------------------------------------------------------------------------------------|--------|----------|---------|-----------------|--------|-------|---------|
|                                                                                                                                                                                                                 |                                                                                    | Total  | Observed | Imputed |                 | Lower  | Upper |         |
| Overall                                                                                                                                                                                                         |  | 241    | 214      | 27      | 1.14            | 0.87   | 1.49  | 0.356   |
| COPD - Yes                                                                                                                                                                                                      |  | 140    | 120      | 20      | 1.50            | 0.73   | 3.05  | 0.266   |
| COPD - No                                                                                                                                                                                                       |  | 101    | 94       | 7       | 1.04            | 0.45   | 2.41  | 0.923   |
| Baseline mMRC - 1 or 2                                                                                                                                                                                          |  | 76     | 67       | 9       | 1.36            | 0.52   | 3.59  | 0.529   |
| Baseline mMRC - 3 or 4                                                                                                                                                                                          |  | 158    | 141      | 17      | 1.07            | 0.54   | 2.14  | 0.841   |
| COPD - Yes; Baseline mMRC - 1 or 2                                                                                                                                                                              |  | 46     | 39       | 7       | 2.18            | 0.60   | 7.84  | 0.235   |
| COPD - Yes; Baseline mMRC - 3 or 4                                                                                                                                                                              |  | 92     | 80       | 12      | 1.15            | 0.47   | 2.84  | 0.760   |
| COPD - No; Baseline mMRC - 1 or 2                                                                                                                                                                               |  | 30     | 28       | 2       | 0.59            | 0.12   | 2.89  | 0.512   |
| COPD - No; Baseline mMRC - 3 or 4                                                                                                                                                                               |  | 66     | 61       | 5       | 0.97            | 0.34   | 2.79  | 0.956   |

CI - confidence intervals; mMRC - modified Medical Research Council breathless scale; COPD – chronic obstructive pulmonary disease.

## Appendix 2

| Domain: Intensity. Threshold for difference: <b>15% relative difference</b> mean days 5-7 over baseline<br>Measure 0-100mm visual analogue scale (VAS) – <i>breathlessness (intensity) now.</i> | Number |          |         | Odds ratio (OR) | 95% CI |       | p value |
|-------------------------------------------------------------------------------------------------------------------------------------------------------------------------------------------------|--------|----------|---------|-----------------|--------|-------|---------|
|                                                                                                                                                                                                 | Total  | Observed | Imputed |                 | Lower  | Upper |         |
| Overall                                                                                                                                                                                         | 264    | 233      | 31      | 0.97            | 0.75   | 1.25  | 0.814   |
| COPD - Yes                                                                                                                                                                                      | 155    | 133      | 22      | 0.68            | 0.35   | 1.32  | 0.259   |
| COPD - No                                                                                                                                                                                       | 109    | 100      | 9       | 1.50            | 0.68   | 3.29  | 0.317   |
| Baseline mMRC - 1 or 2                                                                                                                                                                          | 77     | 68       | 9       | 1.02            | 0.40   | 2.62  | 0.968   |
| Baseline mMRC - 3 or 4                                                                                                                                                                          | 167    | 148      | 19      | 0.93            | 0.49   | 1.77  | 0.817   |
| COPD - Yes; Baseline mMRC - 1 or 2                                                                                                                                                              | 46     | 39       | 7       | 0.72            | 0.21   | 2.47  | 0.607   |
| COPD - Yes; Baseline mMRC - 3 or 4                                                                                                                                                              | 99     | 86       | 13      | 0.53            | 0.23   | 1.23  | 0.141   |
| COPD - No; Baseline mMRC - 1 or 2                                                                                                                                                               | 31     | 29       | 2       | 1.72            | 0.39   | 7.57  | 0.475   |
| COPD - No; Baseline mMRC - 3 or 4                                                                                                                                                               | 68     | 62       | 6       | 2.12            | 0.76   | 5.91  | 0.151   |

CI - confidence intervals; mMRC - modified Medical Research Council breathless scale; COPD – chronic obstructive pulmonary disease.

| Domain: Intensity. Threshold for difference: <b>8.9mm absolute difference</b> mean days 5-7 over baseline<br>Measure 0-100mm visual analogue scale (VAS) – <i>breathlessness (intensity) now</i> . |  | Number |          |         | Odds ratio (OR) | 95% CI |       | p value |
|----------------------------------------------------------------------------------------------------------------------------------------------------------------------------------------------------|--|--------|----------|---------|-----------------|--------|-------|---------|
|                                                                                                                                                                                                    |  | Total  | Observed | Imputed |                 | Lower  | Upper |         |
| Overall                                                                                                                                                                                            |  | 264    | 233      | 31      | 0.87            | 0.68   | 1.13  | 0.308   |
| COPD - Yes                                                                                                                                                                                         |  | 155    | 133      | 22      | 0.79            | 0.40   | 1.55  | 0.491   |
| COPD - No                                                                                                                                                                                          |  | 109    | 100      | 9       | 0.72            | 0.33   | 1.61  | 0.428   |
| Baseline mMRC - 1 or 2                                                                                                                                                                             |  | 77     | 68       | 9       | 0.50            | 0.19   | 1.34  | 0.168   |
| Baseline mMRC - 3 or 4                                                                                                                                                                             |  | 167    | 148      | 19      | 0.75            | 0.39   | 1.44  | 0.382   |
| COPD - Yes; Baseline mMRC - 1 or 2                                                                                                                                                                 |  | 46     | 39       | 7       | 0.50            | 0.14   | 1.78  | 0.281   |
| COPD - Yes; Baseline mMRC - 3 or 4                                                                                                                                                                 |  | 99     | 86       | 13      | 0.81            | 0.35   | 1.87  | 0.619   |
| COPD - No; Baseline mMRC - 1 or 2                                                                                                                                                                  |  | 31     | 29       | 2       | 0.48            | 0.10   | 2.20  | 0.345   |
| COPD - No; Baseline mMRC - 3 or 4                                                                                                                                                                  |  | 68     | 62       | 6       | 0.67            | 0.24   | 1.89  | 0.451   |

CI - confidence intervals; mMRC - modified Medical Research Council breathless scale; COPD – chronic obstructive pulmonary disease.

### Appendix 3

| Domain: Intensity. Threshold for difference: <b>15% relative difference</b> mean days 5-7 over baseline<br>Measure 0-100mm visual analogue scale (VAS) – <i>breathlessness unpleasantness now.</i> | Number |          |         | Odds ratio (OR) | 95% CI |       | p value |
|----------------------------------------------------------------------------------------------------------------------------------------------------------------------------------------------------|--------|----------|---------|-----------------|--------|-------|---------|
|                                                                                                                                                                                                    | Total  | Observed | Imputed |                 | Lower  | Upper |         |
| Overall                                                                                                                                                                                            | 258    | 227      | 31      | 1.25            | 0.95   | 1.63  | 0.108   |
| COPD - Yes                                                                                                                                                                                         | 153    | 130      | 23      | 1.20            | 0.58   | 2.46  | 0.622   |
| COPD - No                                                                                                                                                                                          | 105    | 97       | 8       | 2.22            | 0.97   | 5.12  | 0.060   |
| Baseline mMRC - 1 or 2                                                                                                                                                                             | 76     | 66       | 10      | 0.91            | 0.34   | 2.45  | 0.850   |
| Baseline mMRC - 3 or 4                                                                                                                                                                             | 163    | 145      | 18      | 2.09            | 1.05   | 4.14  | 0.035   |
| COPD - Yes; Baseline mMRC - 1 or 2                                                                                                                                                                 | 46     | 38       | 8       | 0.67            | 0.17   | 2.64  | 0.566   |
| COPD - Yes; Baseline mMRC - 3 or 4                                                                                                                                                                 | 97     | 84       | 13      | 1.50            | 0.62   | 3.62  | 0.368   |
| COPD - No; Baseline mMRC - 1 or 2                                                                                                                                                                  | 30     | 28       | 2       | 1.32            | 0.30   | 5.81  | 0.715   |
| COPD - No; Baseline mMRC - 3 or 4                                                                                                                                                                  | 66     | 61       | 5       | 3.41            | 1.13   | 10.23 | 0.029   |

CI - confidence intervals; mMRC - modified Medical Research Council breathless scale; COPD – chronic obstructive pulmonary disease.

| Domain: Intensity. Threshold for difference: <b>8.9mm absolute difference</b> mean days 5-7 over baseline<br>Measure 0-100mm visual analogue scale (VAS) – <i>breathlessness unpleasantness now.</i> |  | Number |          |         | Odds ratio (OR) | 95% CI |       | p value |
|------------------------------------------------------------------------------------------------------------------------------------------------------------------------------------------------------|--|--------|----------|---------|-----------------|--------|-------|---------|
|                                                                                                                                                                                                      |  | Total  | Observed | Imputed |                 | Lower  | Upper |         |
| Overall                                                                                                                                                                                              |  | 258    | 227      | 31      | 1.03            | 0.79   | 1.34  | 0.812   |
| COPD - Yes                                                                                                                                                                                           |  | 153    | 130      | 23      | 1.00            | 0.51   | 1.96  | 0.993   |
| COPD - No                                                                                                                                                                                            |  | 105    | 97       | 8       | 1.17            | 0.52   | 2.64  | 0.709   |
| Baseline mMRC - 1 or 2                                                                                                                                                                               |  | 76     | 66       | 10      | 0.64            | 0.23   | 1.73  | 0.378   |
| Baseline mMRC - 3 or 4                                                                                                                                                                               |  | 163    | 145      | 18      | 1.18            | 0.59   | 2.38  | 0.640   |
| COPD - Yes; Baseline mMRC - 1 or 2                                                                                                                                                                   |  | 46     | 38       | 8       | 1.02            | 0.26   | 3.95  | 0.982   |
| COPD - Yes; Baseline mMRC - 3 or 4                                                                                                                                                                   |  | 97     | 84       | 13      | 0.97            | 0.40   | 2.36  | 0.941   |
| COPD - No; Baseline mMRC - 1 or 2                                                                                                                                                                    |  | 30     | 28       | 2       | 0.32            | 0.07   | 1.60  | 0.166   |
| COPD - No; Baseline mMRC - 3 or 4                                                                                                                                                                    |  | 66     | 61       | 5       | 1.58            | 0.53   | 4.69  | 0.406   |

CI - confidence intervals; mMRC - modified Medical Research Council breathless scale; COPD – chronic obstructive pulmonary disease.
